# Supplementary material for: Large-scale RNAi screens identify novel genes that interact with the C. elegans retinoblastoma pathway as well as splicing-related components with synMuv B activity
Source: PubMed Central journal article supplement (PMC1863419; doi:10.1186/1471-213x-7-30), 2007-04-06
Supplement: 1471-213X-7-30-S4.pdf [file 1471-213X-7-30-S4.pdf]

## Additional file 4

A

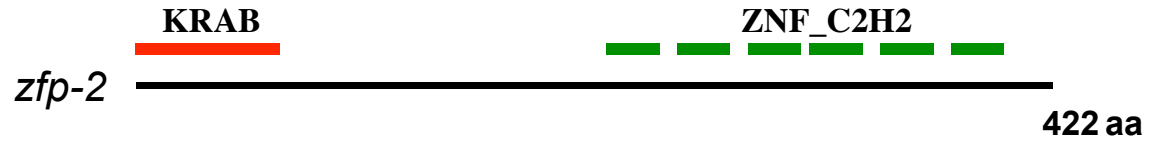

B

|                            |                                                                        |
|----------------------------|------------------------------------------------------------------------|
| Consensus KRAB A DOMAIN    | RTLVTFKDVFVDFTR <b>EEW</b> KLLDTAQQIVYRNV <b>MLE</b> ENYKLLVSL         |
| Human RBaK                 | MNTLOGPVSFKDVAVDFTQ <b>EEW</b> QQLDPDEKITYRDV <b>MLE</b> ENYSHLVSV     |
| <i>C. elegans zfp-2</i>    | MEEMMN <b>DP</b> SAMVIY <b>EEE</b> VTTAPNLPCSLIQ <b>RSW</b> DEEKPIGY   |
| <i>C. briggsae</i> homolog | MEELM <b>LEDP</b> NATVLY <b>EEE</b> VTTATDISTDIPST <b>SRA</b> WSNEKPLG |

(A) *zfp-2* encodes a protein containing six C2H2 zinc fingers and a putative KRAB motif.

(B) Homology among a consensus KRAB domain, the KRAB domain for human RBaK (interacts with Rb), and the putative KRAB domain of *zfp-2* and its homolog in *C. briggsae*.
